# Supplementary material for: Co-encapsulation of tamoxifen citrate and quercetin using 2HP-β-cyclodextrin: a response surface experimental design
Source: Royal Society of Chemistry journal article supplement (doi:10.1039/c6ra21166f), 2016-01-01
Supplement: c6ra21166f1.pdf [file c6ra21166f1.pdf]

Supplementary file:

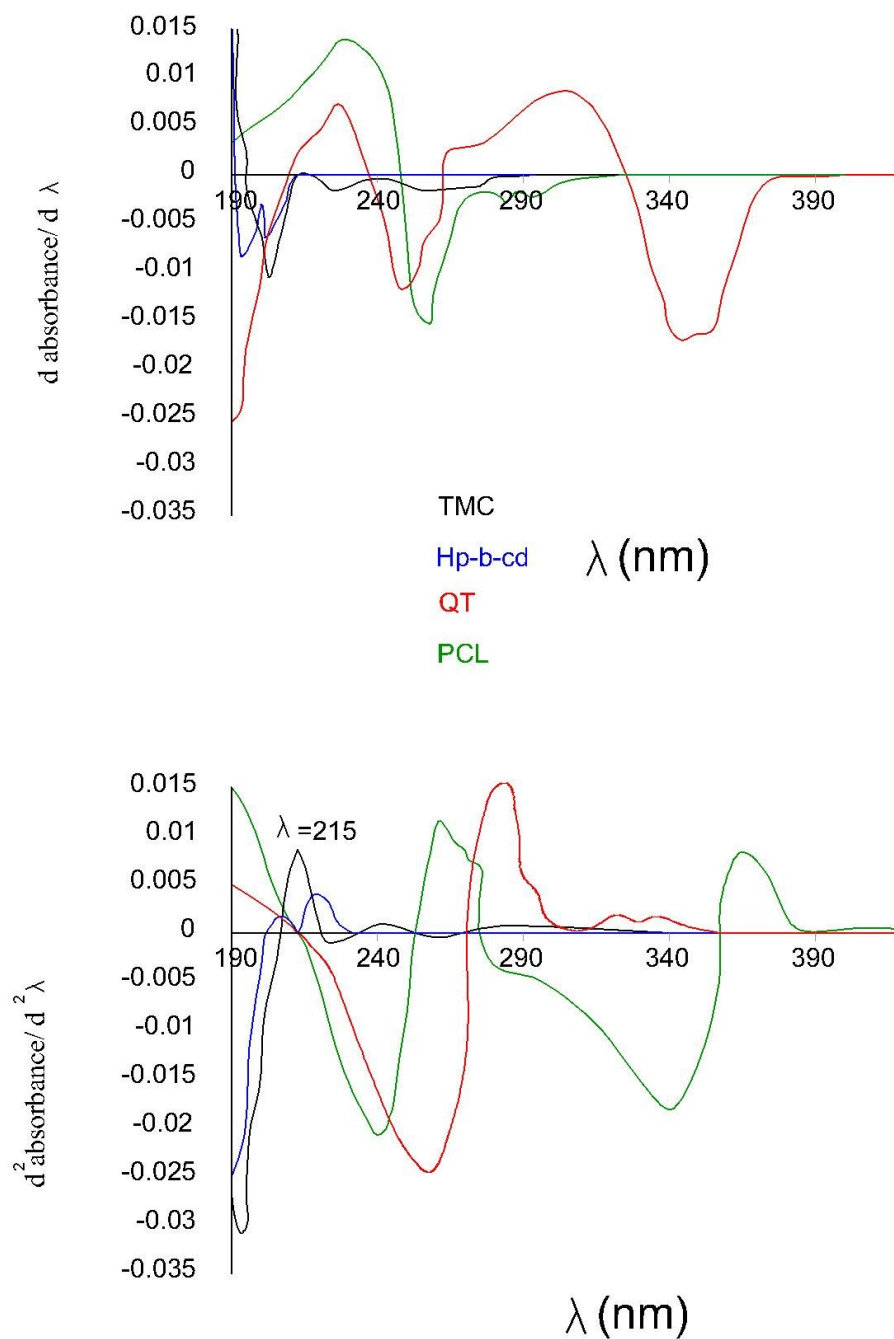

Figure S1: First (a) and second (b) derivative UV spectra of TMC, QT, PCL and 2Hp- $\beta$ -CD

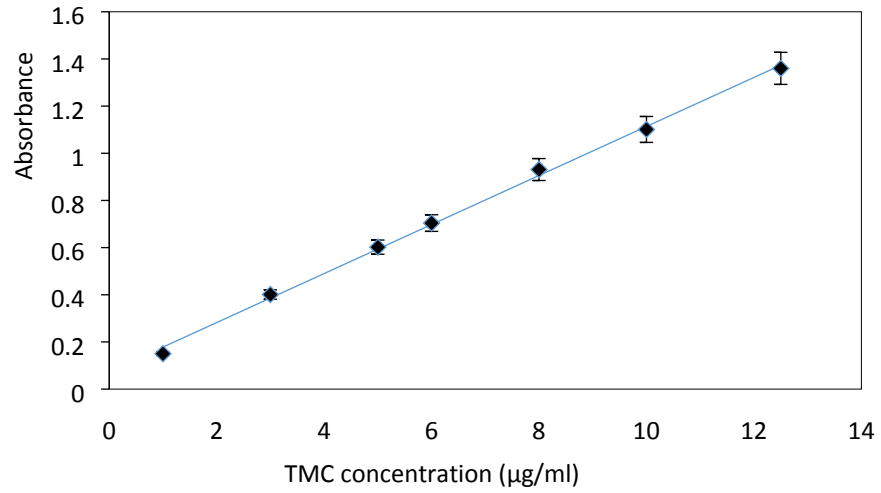

Figure S2: Standard calibration curve of tamoxifen citrate at the wavelength of  $\lambda=237$  nm.

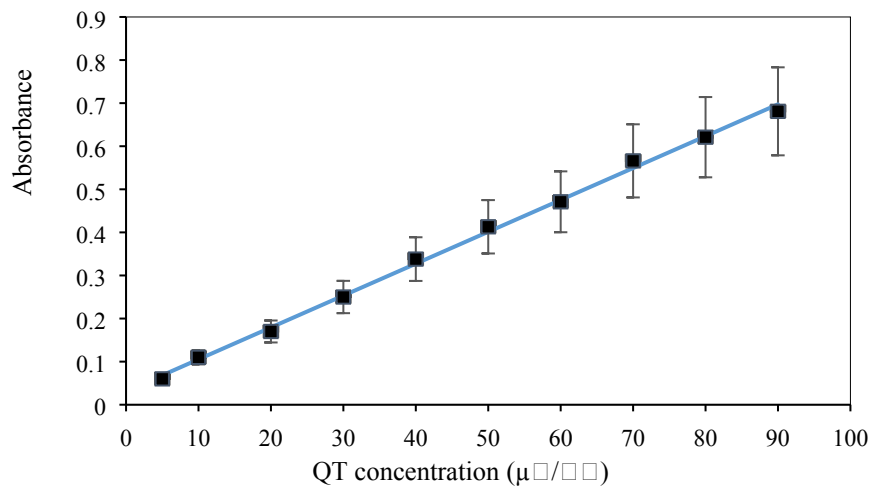

Figure S3: Standard calibration curve of quercetin at the wavelength of  $\lambda=370$  nm.

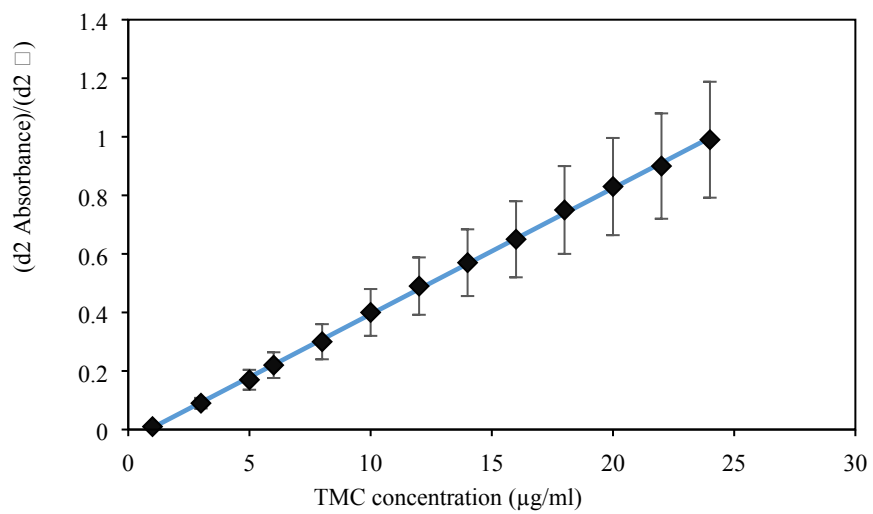

Figure S4: New standard calibration curve of tamoxifen citrate at the wavelength of  $\lambda=215$  nm.
